# Supplementary material
Source: ML conference proceedings conference paper supplement (https://proceedings.mlr.press/v97/ganea19a.html)
Supplement: Supplementary file 1 [file ganea19a-supp.pdf]

## A. Proof of Theorem 1

*Proof.* We derived in the main text that  $r(\mathbf{A}_{Q_\Theta}) \leq d + 1$ . In addition, Eckart-Young-Mirsky theorem gives:

$$\|\mathbf{A}_{P^*} - \mathbf{B}\|_F^2 \geq \sqrt{\sigma_{d+2}^2 + \dots + \sigma_M^2},$$

$$\forall \mathbf{B} \in \mathbb{R}^{M \times N} \text{ s.t. } r(\mathbf{B}) \leq d + 1$$

Thus, our result follows for  $\mathbf{B} = \mathbf{A}_{Q_\Theta}$ .  $\square$

## B. Proof of Theorem 2

*Proof.* i) Using the non-negativity property of the KL divergence, one derives:

$$KL(R||Q) = H(R, Q) - H(R) \geq 0 \quad (16)$$

for any probability distribution  $R$ . The result follows easily by taking  $R = P^*$ .

ii) Let  $Q_{\mathbf{h}}(x_i) \propto \exp(\langle \mathbf{w}_i, \mathbf{h} \rangle)$ . Then, for any probability distribution  $R$ , it is straightforward to derive that

$$H(R, Q_{\mathbf{h}}) = -\langle \mathbb{E}_R[\mathbf{w}], \mathbf{h} \rangle + \log Z^{(\mathbf{h})} \quad (17)$$

Moreover, if  $R \in \mathcal{P}^*$  is any distribution satisfying the  $d$ -dimensional linear constraints, one derives from eq. (17) that

$$H(P^*, Q_{\mathbf{h}}) = H(R, Q_{\mathbf{h}}), \forall R \in \mathcal{P}^* \quad (18)$$

combining eqs. (16) and (18), we get:

$$H(P^*, Q_{\mathbf{h}}) \geq H(R), \forall R \in \mathcal{P}^* \quad (19)$$

thus

$$H(P^*, Q_{\mathbf{h}}) \geq \max_{R \in \mathcal{P}^*} H(R) \quad (20)$$

which, since  $Q_{\mathbf{h}}$  is arbitrary in the above exponential family, implies that

$$\min_{\mathbf{h}} H(P^*, Q_{\mathbf{h}}) \geq \max_{R \in \mathcal{P}^*} H(R) \quad (21)$$

We are only left with proving the reverse, namely that  $\min_{\mathbf{h}} H(P^*, Q_{\mathbf{h}}) \leq \max_{R \in \mathcal{P}^*} H(R)$ . We use the standard derivations for the Maximum Entropy Principle, namely we form the Lagrangian:

$$L(\boldsymbol{\lambda}, \beta, \mathbf{h}) := H(R) + \beta \left( \sum_{i=1}^M R(x_i) - 1 \right) + \langle \boldsymbol{\lambda}, \mathbb{E}_R[\mathbf{w}] - \mathbb{E}_{P^*}[\mathbf{w}] \rangle \quad (22)$$

Setting its derivatives to 0, one gets that the optimal  $R^* = \arg \max_{R \in \mathcal{P}^*} H(R)$  has the form

$$R^*(x_i) \propto \exp(\langle \mathbf{w}_i, \boldsymbol{\lambda}^* \rangle) \quad (23)$$

for some  $\boldsymbol{\lambda}^* \in \mathbb{R}^d$  that is chosen by solving the  $d$ -linear system  $\mathbb{E}_{R^*}[\mathbf{w}] - \mathbb{E}_{P^*}[\mathbf{w}] = 0$ . One can observe that  $Q_{\boldsymbol{\lambda}^*} = R^*$ , getting

$$\min_{\mathbf{h}} H(P^*, Q_{\mathbf{h}}) \leq H(P^*, Q_{\boldsymbol{\lambda}^*}) = H(P^*, R^*)$$

Finally, using eq. (18), we get:

$$H(P^*, R^*) = H(R^*, R^*) = H(R^*) = \max_{R \in \mathcal{P}^*} H(R)$$

which concludes the proof.  $\square$

## C. Proof of Theorem 3

*Proof.* Since  $f(\mathbf{A})$  has rank at least  $K$ , there exists at least one submatrix  $\mathbf{M} \in \mathbb{R}^{K \times K}$  of  $\mathbf{A}$  such that  $\det(f(\mathbf{M})) \neq 0$ . Let  $b_1 < b_2 < \dots < b_T$  be all the distinct values of  $\mathbf{M}$ . Denote by  $\epsilon = \frac{1}{4} \min_{i>1} |b_i - b_{i-1}|$ . We first prove the following lemmas.

**Lemma 8.** *Let  $P \in \mathbb{R}[X_1, \dots, X_T]$  be a multivariate polynomial with real coefficients. Assume there exist infinite sets  $S_1, \dots, S_T$  such that  $P$  vanishes on all the points of  $S_1 \times S_2 \times \dots \times S_T$ . Then  $P$  vanishes on any point of  $\mathbb{R}^T$ .*

*Proof.* We prove this by induction over  $T$ . The result easily holds for  $T = 1$  since a real univariate non-zero polynomial can only have a finite set of roots. Assume now that the result holds for any polynomial in  $T - 1$  variables. We can write  $P(X_1, X_2, \dots, X_T)$  as a univariate polynomial in  $X_1$  with coefficients polynomials in  $\mathbb{R}[X_2, \dots, X_T]$  as follows:  $P(X_1, X_2, \dots, X_T) = \sum_{i=0}^{d_1} Q_i(X_2, \dots, X_T) X_1^i$ , where  $d_1$  is the maximum degree of  $X_1$ . For any arbitrary  $x_2, \dots, x_T \in S_2 \times \dots \times S_T$ , we know from the hypothesis that  $P(c, x_2, \dots, x_T) = 0, \forall c \in S_1$ . Since  $S_1$  is infinite we have that the univariate polynomial in  $X_1$  is identical 0, i.e.  $P(X, x_2, \dots, x_T) \equiv 0$ , which implies that  $Q_i(x_2, \dots, x_T) = 0$ . However,  $x_2, \dots, x_T \in S_2 \times \dots \times S_T$  were chosen arbitrarily, thus  $Q_i(x_2, \dots, x_T) = 0, \forall x_2, \dots, x_T \in S_2 \times \dots \times S_T$ . Applying the induction hypothesis for  $T - 1$ , one gets that all  $Q_i$  vanish on the full  $\mathbb{R}^{T-1}$ . Thus,  $P(X, x_2, \dots, x_T) \equiv 0, \forall (x_2, \dots, x_T) \in \mathbb{R}^{T-1}$ , which implies that  $P(x_1, x_2, \dots, x_T) = 0, \forall (x_1, x_2, \dots, x_T) \in \mathbb{R}^T$ .  $\square$

**Lemma 9.** *There exist  $c_i \in [b_i - \epsilon, b_i + \epsilon], \forall i \in \{1, \dots, T\}$  s.t. given any pointwise function  $h$  satisfying  $h(b_i) = c_i, \forall 1 \leq i \leq T$ , we have  $\det(h(\mathbf{M})) \neq 0$ .*

*Proof.* Assume the contrary, that  $\forall c_i \in [b_i - \epsilon, b_i + \epsilon], \det(h(\mathbf{M})) = 0$ .

We note that, using the Leibniz formula of the determinant, one easily sees that  $\det(\mathbf{M})$  can be written as

$P(b_1, \dots, b_T)$ , where  $P \in \mathbb{R}[X_1, \dots, X_T]$  is a multivariate polynomial in  $T$  variables. It is then easy to see that any pointwise  $h$  will change the determinant of  $\mathbf{M}$  as:  $\det(h(\mathbf{M})) = P(h(b_1), \dots, h(b_T))$ . Then, assuming this lemma is not true is equivalent with  $P(c_1, \dots, c_T) = 0, \forall c_i \in [b_i - \epsilon, b_i + \epsilon], \forall 1 \leq i \leq T$ . Applying lemma 8 to sets  $S_i = [b_i - \epsilon, b_i + \epsilon]$ , one gets that  $P(c_1, \dots, c_T) = 0, \forall c_i \in \mathbb{R}, \forall i \in \{1, \dots, T\}$ . Taking  $c_i = f(b_i)$  one obtains  $\det(f(\mathbf{M})) = P(f(b_1), \dots, f(b_T)) = 0$  which is a contradiction with our assumption on  $\mathbf{M}$  and  $f$ .  $\square$

We now return to the proof of the main theorem. For each  $i \in \{1, \dots, T\}$ , let us denote by  $c_i \in [b_i - \epsilon, b_i + \epsilon]$  the values from lemma 9 that guarantee a non-zero determinant. We construct a pointwise bijective, piecewise differentiable, continuous and strictly increasing function  $g : \mathbb{R} \rightarrow \mathbb{R}$  such that  $g(b_i) = c_i$ . It is obvious that  $\det(g(\mathbf{M}))$  depends only on the values  $g(b_i)$ , so we are free to assign any other values to any other real input of  $g$  as long as the above constraints on  $g$  are satisfied. One example of such  $g$  is a piecewise linear function defined to match the following values:  $g(b_i) = c_i, g(b_i + 2\epsilon) = b_i + 2\epsilon, \forall 1 \leq i \leq T, g(x) = x, \forall x < b_1 - 2\epsilon$  and  $g(x) = x, \forall x > b_T + 2\epsilon$ . It can be easily seen that such a function is bijective, piecewise differentiable, continuous and strictly increasing.  $\square$

## D. Proof of Lemma 4

*Proof.* If  $\langle \mathbf{w}_i, \mathbf{h}_{j_i} \rangle$  are distinct from all the other entries in the matrix  $\mathbf{A}$ , one can design the following pointwise function:

$$f(x) = \begin{cases} 1 & \text{if } \exists i \text{ s.t. } x = \langle \mathbf{w}_i, \mathbf{h}_{j_i} \rangle \\ 0 & \text{else} \end{cases}$$

Then, let  $\mathbf{B}$  be the  $M \times M$  submatrix of  $\mathbf{A}$  consisting of all its  $M$  rows and the  $M$  columns indexed by  $j_i$ 's. It is then clear that  $f(\mathbf{B}) = \mathbf{I}_M$ , which is obviously full rank.  $\square$

## E. Proof of Theorem 6

*Proof.* We will make use of the following folklore lemmas:

**Lemma 10.** *Let  $\mathcal{M} = \cup_i M_i$  be a finite union of Riemannian manifolds of dimension  $m$ , embedded in  $\mathbb{R}^k$ , with Riemannian metric  $g_i$  inherited from  $\mathbb{R}^k$ . Then, any finite union  $S$  of submanifolds of the  $M_i$ 's of dimensions strictly smaller than  $m$  is a set of null measure<sup>6</sup>. In other words, any point from  $\mathcal{M}$  is almost surely not in  $S$ .*

*Proof.* (sketch) any submanifold of  $\mathcal{M}$  of strictly smaller

<sup>6</sup>w.r.t. the volume form of the manifold, i.e. locally w.r.t. to the  $m$ -dimensional Lebesgue measure.

dimension than  $m$  has volume or measure zero. The result then follows from the fact that a finite union of sets of measure zero has also measure zero.  $\square$

**Lemma 11.** *The set  $O_k^N$  of rank- $k$  matrices of size  $N \times N$  with  $0 < k < N$  is a Riemannian manifold of dimension  $2kN - k^2$  embedded in  $\mathbb{R}^{N \times N}$ .*

*Proof.* See e.g. (Shalit et al., 2012). The Riemannian metric for embedded manifolds is simply the Euclidean metric restricted to the manifold.  $\square$

We now return to the main proof of the theorem. From lemma 11 we have that  $\dim(O_{N-1}^N) = N^2 - 1$ . We want to prove that the subset of  $O_{N-1}^N$  of rank  $N - 1$  matrices for which  $x^2$  is not increasing their rank has dimension strictly smaller than  $\dim(O_{N-1}^N)$ . In this case, using lemma 10, the measure of all ill-behaved matrices would be 0, so any matrix from  $O_{N-1}^N$  is almost surely well-behaved, i.e. the rank of  $\mathbf{A}^{\odot 2}$  is almost surely full rank  $N$  for  $\mathbf{A} \in O_{N-1}^N$ .

We begin by removing from  $O_{N-1}^N$  the set of all matrices that have two proportional columns, a set that we name  $\Xi^N$ . This is a finite<sup>7</sup> union of manifolds of dimension  $N(N - 1) + 1$ , namely all sets of matrices for which column  $i$  is proportional to column  $j$ , for all  $1 \leq i < j \leq N$ <sup>8</sup>. Using lemma 10, we derive that the measure or volume of  $\Xi^N$  is 0.

Now, for any arbitrary  $\mathbf{A} \in O_{N-1}^N \setminus \Xi^N$  with columns  $\mathbf{x}^{(1)}, \dots, \mathbf{x}^{(N)} \in \mathbb{R}^N$ , one can easily derive that  $\exists \gamma_i \in \mathbb{R}$  not all equal to 0 s.t.  $\sum_{i=1}^N \gamma_i \mathbf{x}^{(i)} = 0$ . We know that at least one  $\gamma_i \neq 0$  from the fact that  $\mathbf{A} \in O_{N-1}^N$ ; let us denote by  $\Gamma^i$  the set of such matrices  $\mathbf{A} \in O_{N-1}^N$ . Since  $O_{N-1}^N$  is the (finite) union of the  $\Gamma^i$ 's, we want to show that the set of ill-behaved matrices in each  $\Gamma^i$  is contained in a manifold of dimension strictly smaller than that of  $O_{N-1}^N$ , which will conclude, using the fact that a finite union of null measure sets has null measure.

Without loss of generality, let us assume that  $\mathbf{A} \in \Gamma^N$ , i.e. that  $\gamma_N \neq 0$ . Let us note that

$$\Gamma^N = \{\mathbf{A} \in O_{N-1}^N : \gamma_N = 1\}, \quad (24)$$

by substituting each  $\gamma_i$  with  $\gamma_i/\gamma_N$  for  $1 \leq i \leq N - 1$ .

<sup>7</sup>More precisely, of  $\frac{N(N-1)}{2}$  manifolds, one per each pair of columns.

<sup>8</sup>The  $N(N-1)+1$  dimension comes from the fact that there are  $N-1$  independent columns, plus a scalar, namely the multiplication factor between column  $i$  and column  $j$ .

If  $\mathbf{A}^{\odot 2}$  is not full rank, there exist  $\alpha_1, \dots, \alpha_N \in \mathbb{R}$  such that

$$\sum_{i=1}^{N-1} \alpha_i (\mathbf{x}^{(i)})^{\odot 2} = \alpha_N \left( \sum_{i=1}^{N-1} \gamma_i \mathbf{x}^{(i)} \right)^{\odot 2}. \quad (25)$$

For fixed  $\alpha_1, \dots, \alpha_N \in \mathbb{R}$ , denote by  $M_\alpha$  the subset of the solutions  $\{\mathbf{x}^{(i)}\}_{1 \leq i \leq N-1} \subset \mathbb{R}^N$  of the above equation.

Define

$$\varphi : (x_k^{(1)}, \dots, x_k^{(N-1)}) \in \mathbb{R}^{N-1} \mapsto \sum_{i=1}^{N-1} \alpha_i (x_k^{(i)})^2 - \alpha_N \left( \sum_{i=1}^{N-1} \gamma_i x_k^{(i)} \right)^2. \quad (26)$$

This can be re-written  $\varphi(\mathbf{x}) = \mathbf{x}^T \mathbf{G} \mathbf{x}$  with

$$G_{ij} = \delta_{ij}(\alpha_i - \alpha_N \gamma_i^2) - (1 - \delta_{ij}) \alpha_N \gamma_i \gamma_j$$

It can be easily shown that since  $\mathbf{A}$  is not in  $\Xi^N$ ,  $\mathbf{G}$  is not the null matrix. Indeed, if  $\mathbf{G} = \mathbf{0}$ , then either  $\alpha_N = 0$  – and then  $\alpha_i = \alpha_N \gamma_i^2 = 0$  for all  $i$ , which is excluded – or  $\alpha_N \neq 0$ , and then  $\alpha_N \gamma_i \gamma_j = 0$  for all  $i \neq j$ , meaning only one  $\gamma_{i_0}$  is non-zero, *i.e.*  $\mathbf{x}^{(N)} = -\gamma_{i_0} \mathbf{x}^{(i_0)}$  and hence  $\mathbf{A} \in \Xi^N$ .

Note that since  $\mathbf{G}$  is not the null matrix,  $\dim(\ker \mathbf{G}) < N - 1$ . Furthermore, let  $U := \mathbb{R}^{N-1} \setminus \ker \mathbf{G}$ . Invoking the Pre-Image theorem, the set  $U \cap \varphi^{-1}(\{0\})$  is a submanifold of  $\mathbb{R}^{N-1}$  of dimension  $(N - 1) - 1 = N - 2$ . Therefore,  $\varphi^{-1}(\{0\})$  is a finite union of manifolds of dimensions smaller than (or equal to)  $N - 2$ .

Since eq. (25) can be written as an intersection of  $N$  equations as the one defined by  $\varphi$  (*i.e.* one per coordinate), the set  $M_\alpha$  of solutions of eq. (25) is included in a finite union of manifolds of dimensions smaller than (or equal to)  $N(N - 2)$ .

Finally, the total set  $X$  of matrices we are after – *i.e.* of rank  $N - 1$  and which cannot be made full ranked by pointwise square – can be defined as the union over  $\alpha$  of all  $M_\alpha$ , *i.e.*  $X = \cup_\alpha M_\alpha$ . As  $X$  has the structure of a fiber bundle, with base space the set of  $\alpha$ 's (of dimension  $N$ ),  $X$  is a subset of submanifolds of dimensions smaller than  $N + N(N - 2) = N^2 - N < N^2 - 1$  for  $N > 1$ , which concludes the proof.  $\square$

## F. Proof of Theorem 7

*Proof.* Let  $h : [-T, T]$  be any increasing function defined on  $[-T, T]$ . Assume bounded derivatives, *i.e.*  $\exists R > 0$  s.t.  $|h'(x)| < R, \forall x \in [-T, T]$ . Then, for a fixed positive integer  $K$ , we consider the knots  $l_i = -T + \frac{2T}{K}i, \forall 0 \leq i \leq K$ . Next, using standard linear interpolation, we define a

piecewise linear function  $f_K : [-T, T] \rightarrow \mathbb{R}$  s.t.  $f_K(l_i) = h(l_i), \forall 0 \leq i \leq K$ . Since  $h$  is increasing, one obtains that  $f_K$  is also increasing. It is then easy to see that  $f_K$  is a PLIF function. Moreover, the slopes are given by the formula:  $s_i = \frac{h(l_{i+1}) - h(l_i)}{l_{i+1} - l_i}$ .

We define the additional function  $g_K(x) := f_K(x) - h(x)$ . We wish to prove that  $\lim_{K \rightarrow \infty} \max_{x \in [-T, T]} |g_K(x)| = 0$ . For this, we first use Cauchy's theorem deriving that  $\exists c_i \in (l_{i+1}, l_i)$  s.t.  $s_i = \frac{h(l_{i+1}) - h(l_i)}{l_{i+1} - l_i} = h'(c_i)$ . Thus, since  $h'$  is bounded by  $R$ , we get that  $|s_i| < R, \forall i$ . This further implies that  $|g'_K(x)| < 2R, \forall x \in [-T, T]$ . Moreover, from the definition of  $f_K$  we have that  $g_K(l_i) = 0, \forall i$ . Finally, for any  $x \in [-T, T]$ , let  $[l_{i+1}, l_i]$  be the interval in which  $x$  lies. We have that:

$$\begin{aligned} |g_K(x)| &= |g_K(x) - g_K(l_i)| = \\ &= \frac{|g_K(x) - g_K(l_i)|}{|x - l_i|} |x - l_i| \leq \\ &\leq 2R|x - l_i| \leq 2R \frac{2T}{K} \end{aligned} \quad (27)$$

where the first inequality happens from the same argument derived from Cauchy's theorem as above. It is now trivial to prove that  $\lim_{K \rightarrow \infty} \max_{x \in [-T, T]} |g_K(x)| = 0$ , which concludes our proof.  $\square$

## G. Effect of the Dirichlet concentration

See fig. 5.

## H. Additional Synthetic Experiments

See figs. 6 to 8.

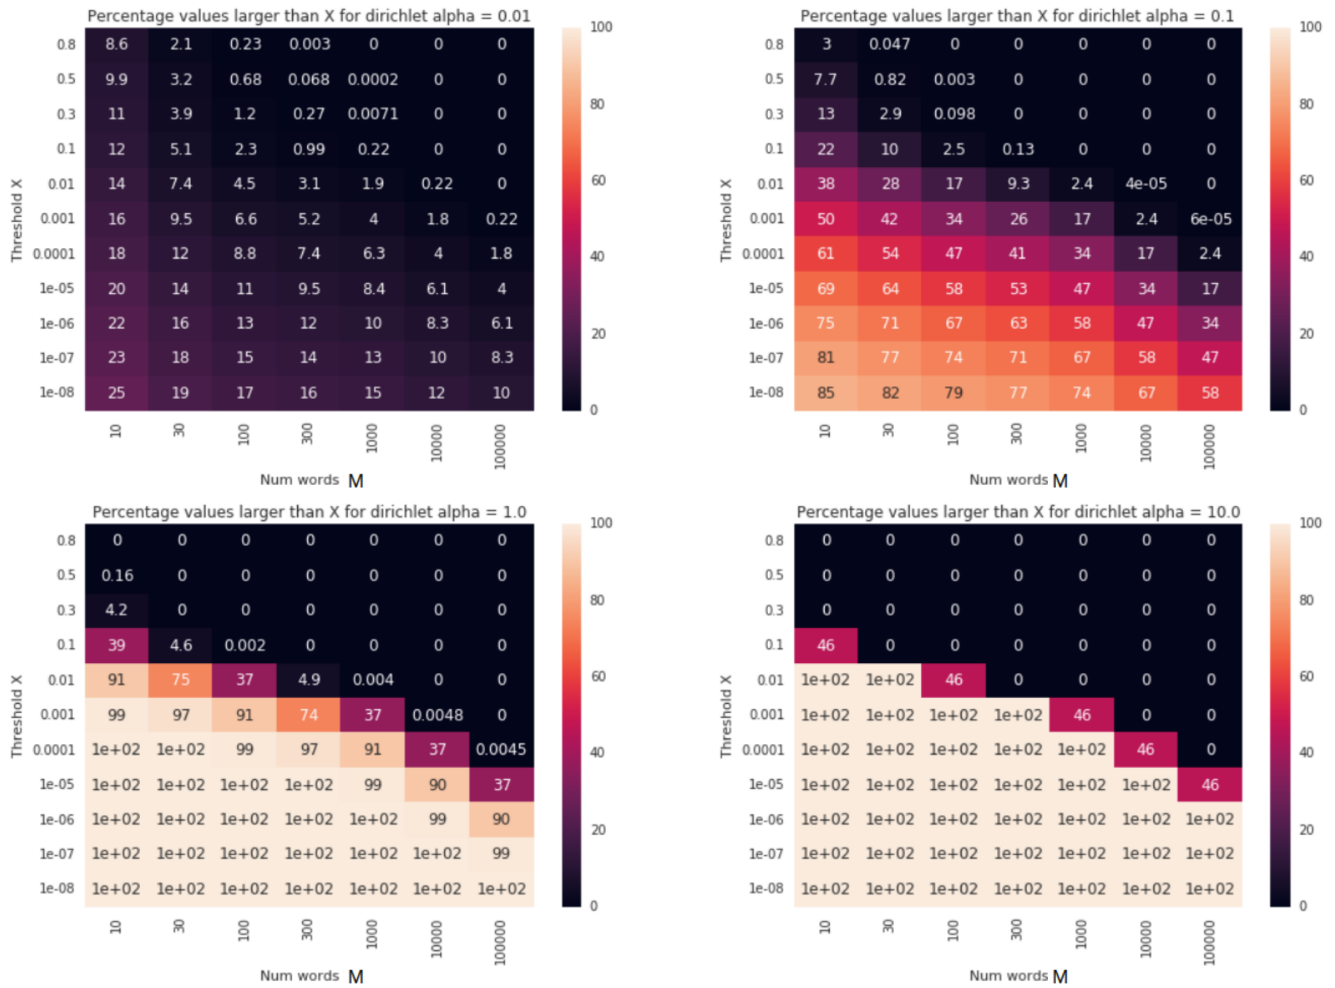

Figure 5. Distribution of  $M$ -class discrete distributions sampled from a Dirichlet prior. Larger concentration parameters result in close to uniform distributions, while low values result in sparse or long-tail distributions.

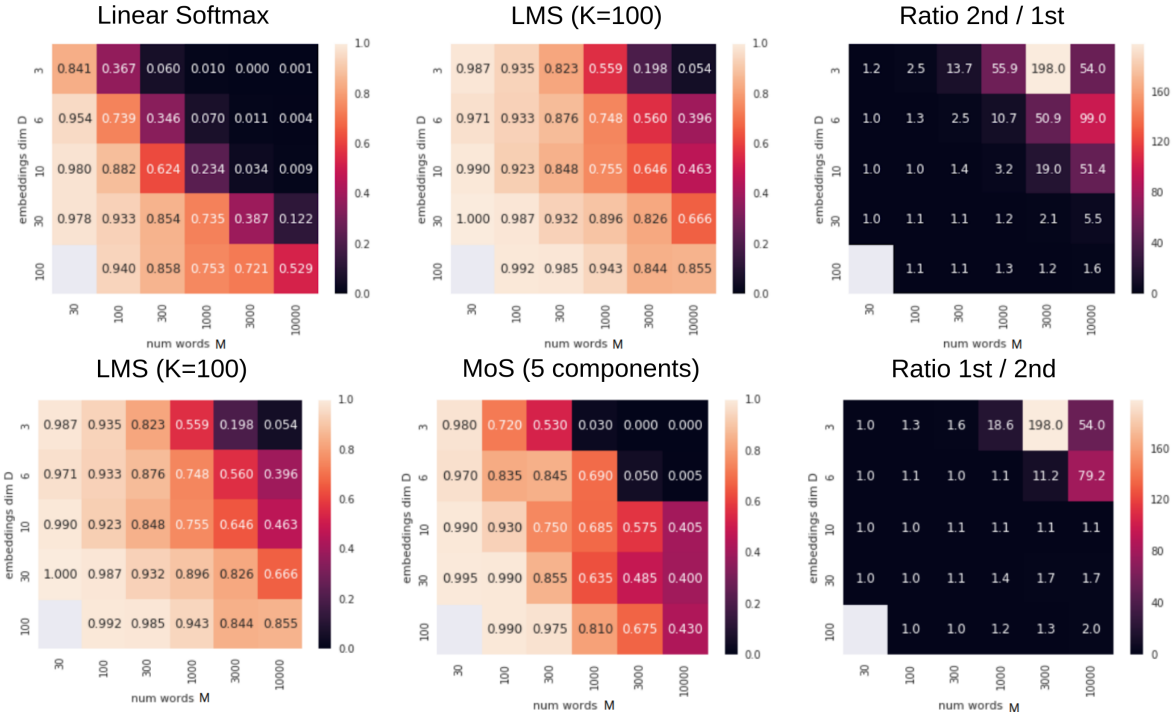

Figure 6. Percentage of contexts  $j$  for which the modes of true and parametric distributions match, i.e.  $\arg \max_i P^*(x_i|c_j) = \arg \max_i Q_{\Theta}(x_i|c_j)$ . Higher the better. Dirichlet concentration  $\alpha = 0.01$ .

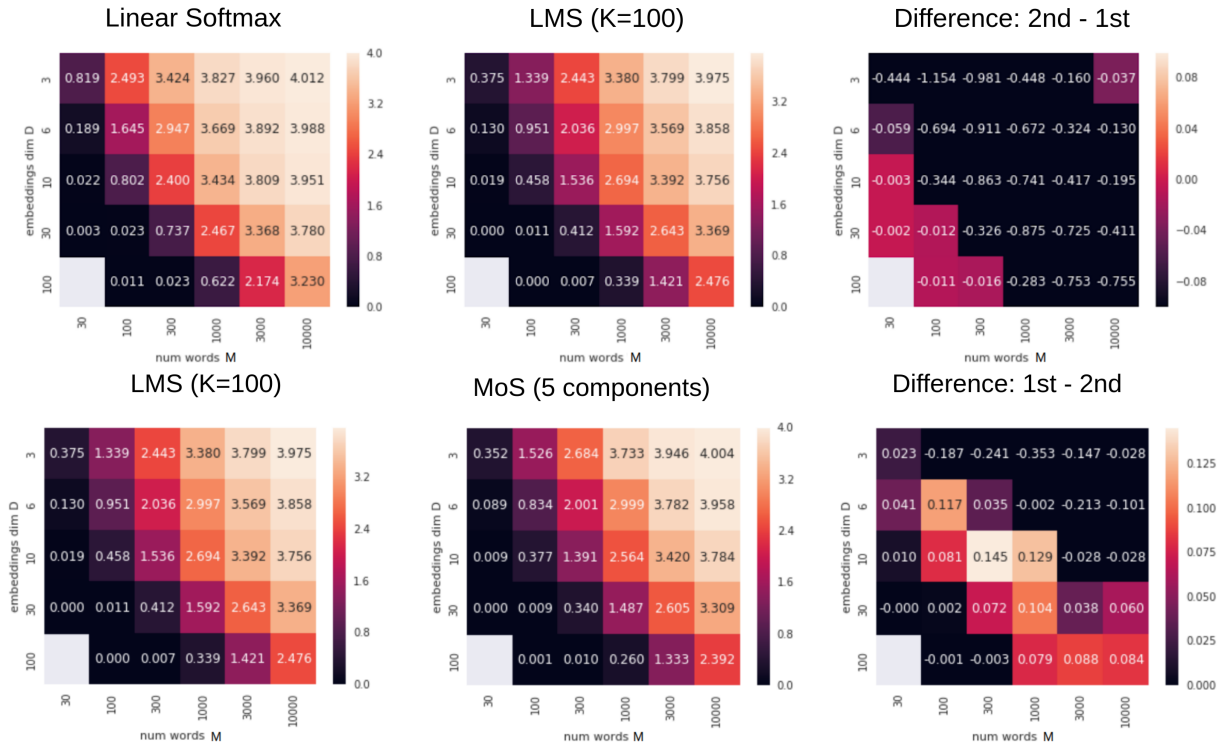

Figure 7. Average  $KL(P^*||Q_{\Theta})$  (across all contexts). Lower the better. Dirichlet concentration  $\alpha = 0.01$ .

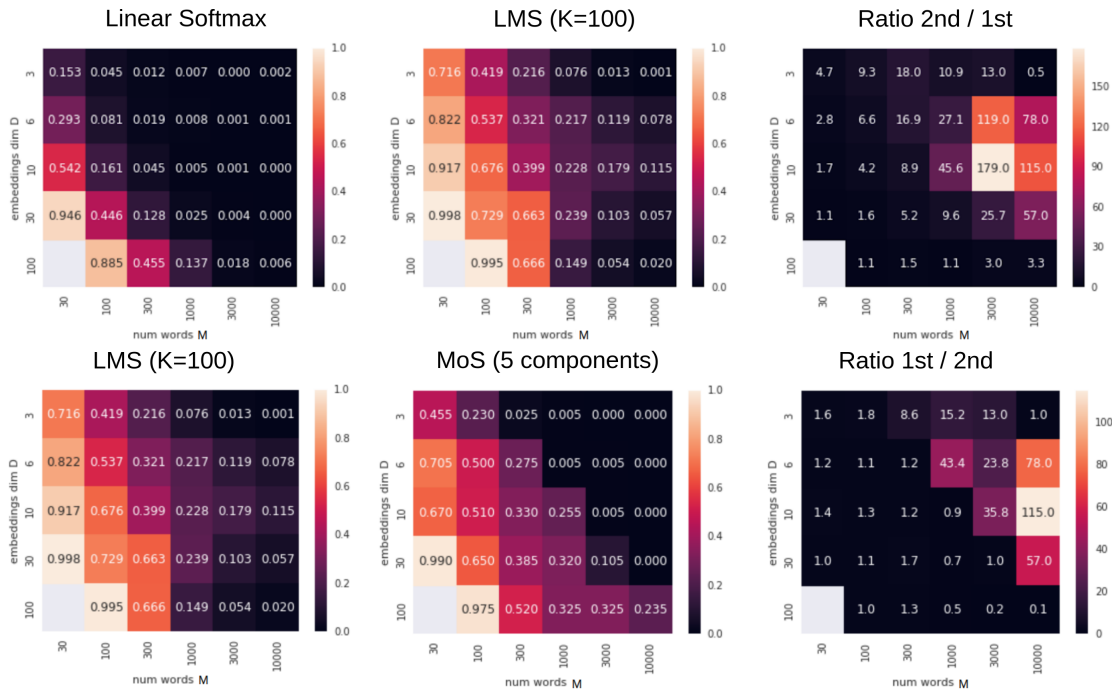

Figure 8. Percentage of contexts  $j$  for which the modes of true and parametric distributions match, i.e.  $\arg \max_i P^*(x_i|c_j) = \arg \max_i Q_{\Theta}(x_i|c_j)$ . Higher the better. Dirichlet concentration  $\alpha = 1$ .
